# Supplementary material for: Whole genome analysis of local Kenyan and global sequences unravels the epidemiological and molecular evolutionary dynamics of RSV genotype ON1 strains
Source: Virus Evol. 2018 Sep 24;4(2):vey027. doi: 10.1093/ve/vey027 (PMC6153471; doi:10.1093/ve/vey027)
Supplement: Supplementary S2 Table [file vey027_supplementary_s2_table.pdf]

| Sample                         | Genome_Accession | genotype | PCR_strategy | No_of_Reads | RSV_Reads | Assembly_length | mean_coverage | Assembler | RT_PCR_Ct | collection_date | SRA_Accession |
|--------------------------------|------------------|----------|--------------|-------------|-----------|-----------------|---------------|-----------|-----------|-----------------|---------------|
| KEN/Kilifi/WGS/1022_28/12/2011 | MH181878         | GA2      | 6-amplicon   | 1,270,622   | 393,958   | 14,912          | 4,483.13      | VIRALNGS  | NA        | 28/12/11        | SAMN08724833  |
| KEN/Kilifi/WGS/1024_09/02/2012 | MH181879         | GA2      | 6-amplicon   | 1,407,764   | 270,288   | 14,697          | 2,961.69      | VIRALNGS  | 22.94     | 09/02/12        | SAMN08724834  |
| KEN/Kilifi/WGS/1025_13/02/2012 | MH181908         | ON1      | 14-amplicon  | 3,293,722   | 3,088,934 | 15,168          | 53,178.19     | VIRALNGS  | 19.26     | 13/02/12        | SAMN08724835  |
| KEN/Kilifi/WGS/1026_16/02/2012 | MH181880         | GA2      | 6-amplicon   | 1,454,390   | 332,690   | 14,697          | 3,457.63      | VIRALNGS  | 21.38     | 16/02/12        | SAMN08724836  |
| KEN/Kilifi/WGS/1028_02/03/2012 | MH181881         | GA2      | 6-amplicon   | 939,372     | 442,216   | 14,913          | 4,740.40      | VIRALNGS  | 19.55     | 02/03/12        | SAMN08724837  |
| KEN/Kilifi/WGS/1029_03/03/2012 | MH181882         | GA2      | 6-amplicon   | 1,125,168   | 465,202   | 14,903          | 5,023.98      | VIRALNGS  | 21.31     | 03/03/12        | SAMN08724838  |
| KEN/Kilifi/WGS/1031_05/03/2012 | MH181883         | GA2      | 6-amplicon   | 1,385,586   | 1,036,466 | 14,915          | 11,068.56     | VIRALNGS  | 20.17     | 05/03/12        | SAMN08724839  |
| KEN/Kilifi/WGS/1032_07/03/2012 | MH181909         | ON1      | 14-amplicon  | 2,602,100   | 2,252,496 | 15,070          | 38,777.92     | VIRALNGS  | 21.64     | 07/03/12        | SAMN08724840  |
| KEN/Kilifi/WGS/1033_09/03/2012 | MH181910         | ON1      | 14-amplicon  | 3,393,018   | 3,272,224 | 15,197          | 55,740.25     | VIRALNGS  | 17.75     | 09/03/12        | SAMN08724841  |
| KEN/Kilifi/WGS/1034_11/03/2012 | MH181911         | ON1      | 14-amplicon  | 2,218,728   | 1,065,438 | 14,959          | 18,236.55     | VIRALNGS  | 24.22     | 11/03/12        | SAMN08724842  |
| KEN/Kilifi/WGS/1035_16/03/2012 | MH181912         | ON1      | 14-amplicon  | 3,380,044   | 3,262,410 | 15,180          | 55,995.24     | VIRALNGS  | 16.98     | 16/03/12        | SAMN08724843  |
| KEN/Kilifi/WGS/1036_21/03/2012 | MH181913         | ON1      | 14-amplicon  | 3,858,536   | 3,746,792 | 15,205          | 64,113.11     | VIRALNGS  | 17.98     | 21/03/12        | SAMN08724844  |
| KEN/Kilifi/WGS/1037_23/03/2012 | MH181884         | GA2      | 6-amplicon   | 984,444     | 1,626     | 14,332          | 44.33         | VIRALNGS  | 24.83     | 23/03/12        | SAMN08724845  |
| KEN/Kilifi/WGS/1038_23/03/2012 | MH181914         | ON1      | 14-amplicon  | 3,886,448   | 3,641,296 | 15,152          | 62,377.42     | VIRALNGS  | 20.41     | 23/03/12        | SAMN08724846  |
| KEN/Kilifi/WGS/1039_25/03/2012 | MH181885         | GA2      | 6-amplicon   | 1,620,128   | 33,722    | 14,686          | 406.46        | VIRALNGS  | 26.31     | 25/03/12        | SAMN08724847  |
| KEN/Kilifi/WGS/1040_26/03/2012 | MH181915         | ON1      | 14-amplicon  | 4,350,992   | 3,963,646 | 15,061          | 66,457.67     | VIRALNGS  | 20.16     | 26/03/12        | SAMN08724848  |
| KEN/Kilifi/WGS/1041_29/03/2012 | MH181916         | ON1      | 14-amplicon  | 3,056,872   | 2,224,280 | 15,140          | 38,552.58     | VIRALNGS  | 21.25     | 29/03/12        | SAMN08724849  |
| KEN/Kilifi/WGS/1043_05/04/2012 | MH181917         | ON1      | 14-amplicon  | 2,191,722   | 1,876,406 | 15,232          | 32,307.51     | SPADES    | 24.16     | 05/04/12        | SAMN08724850  |
| KEN/Kilifi/WGS/1044_10/04/2012 | MH181918         | ON1      | 14-amplicon  | 2,916,484   | 2,762,130 | 15,164          | 47,482.85     | VIRALNGS  | 20.87     | 10/04/12        | SAMN08724851  |
| KEN/Kilifi/WGS/1045_10/04/2012 | MH181886         | GA2      | 6-amplicon   | 1,494,678   | 958,672   | 14,891          | 9,996.56      | VIRALNGS  | 22.16     | 10/04/12        | SAMN08724852  |
| KEN/Kilifi/WGS/1046_13/04/2012 | MH181887         | GA2      | 6-amplicon   | 1,251,788   | 880,908   | 14,549          | 9,824.38      | VIRALNGS  | 21.33     | 13/04/12        | SAMN08724853  |
| KEN/Kilifi/WGS/1047_15/04/2012 | MH181888         | GA2      | 6-amplicon   | 1,641,672   | 383,808   | 14,697          | 4,419.82      | VIRALNGS  | 22.62     | 15/04/12        | SAMN08724854  |
| KEN/Kilifi/WGS/1048_16/04/2012 | MH181889         | GA2      | 6-amplicon   | 1,345,204   | 269,926   | 14,669          | 3,341.61      | VIRALNGS  | 25.2      | 16/04/12        | SAMN08724855  |
| KEN/Kilifi/WGS/1049_17/04/2012 | MH181890         | GA2      | 6-amplicon   | 1,287,742   | 912,588   | 14,876          | 9,912.84      | VIRALNGS  | 20.66     | 17/04/12        | SAMN08724856  |
| KEN/Kilifi/WGS/1050_17/04/2012 | MH181891         | GA2      | 6-amplicon   | 1,483,678   | 35,648    | 14,589          | 431.77        | VIRALNGS  | 25.41     | 17/04/12        | SAMN08724857  |
| KEN/Kilifi/WGS/1051_24/04/2012 | MH181919         | ON1      | 14-amplicon  | 3,056,992   | 2,853,918 | 15,198          | 49,164.32     | VIRALNGS  | 18.44     | 24/04/12        | SAMN08724858  |
| KEN/Kilifi/WGS/1052_25/04/2012 | MH181892         | GA2      | 6-amplicon   | 1,535,990   | 879,362   | 14,693          | 9,480.92      | VIRALNGS  | 19.98     | 25/04/12        | SAMN08724859  |
| KEN/Kilifi/WGS/1053_26/04/2012 | MH181920         | ON1      | 14-amplicon  | 2,552,538   | 2,084,818 | 15,116          | 35,963.84     | VIRALNGS  | 21.81     | 26/04/12        | SAMN08724860  |
| KEN/Kilifi/WGS/1054_16/05/2012 | MH181921         | ON1      | 14-amplicon  | 3,235,132   | 2,694,000 | 15,138          | 45,968.25     | VIRALNGS  | 20.81     | 16/05/12        | SAMN08724861  |
| KEN/Kilifi/WGS/1056_30/05/2012 | MH181922         | ON1      | 14-amplicon  | 2,935,820   | 1,780,478 | 15,049          | 30,814.75     | VIRALNGS  | 22.72     | 30/05/12        | SAMN08724862  |
| KEN/Kilifi/WGS/1058_08/06/2012 | MH181923         | ON1      | 14-amplicon  | 2,312,598   | 1,906,202 | 15,106          | 32,807.75     | SPADES    | 21.04     | 08/06/12        | SAMN08724863  |
| KEN/Kilifi/WGS/1059_08/06/2012 | MH181924         | ON1      | 14-amplicon  | 2,225,810   | 2,187,994 | 15,215          | 37,245.25     | VIRALNGS  | 16.86     | 08/06/12        | SAMN08724864  |
| KEN/Kilifi/WGS/1060_11/06/2012 | MH181925         | ON1      | 14-amplicon  | 2,470,026   | 2,348,036 | 15,188          | 40,483.39     | VIRALNGS  | 18.23     | 11/06/12        | SAMN08724865  |
| KEN/Kilifi/WGS/1061_13/06/2012 | MH181926         | ON1      | 14-amplicon  | 2,071,626   | 1,772,624 | 15,049          | 30,725.88     | VIRALNGS  | 21.53     | 13/06/12        | SAMN08724866  |
| KEN/Kilifi/WGS/1062_15/06/2012 | MH181927         | ON1      | 14-amplicon  | 1,688,810   | 1,123,748 | 15,059          | 19,373.45     | VIRALNGS  | 23.13     | 15/06/12        | SAMN08724867  |
| KEN/Kilifi/WGS/1063_18/06/2012 | MH181928         | ON1      | 14-amplicon  | 2,887,012   | 2,207,944 | 15,042          | 37,782.03     | VIRALNGS  | 21.58     | 18/06/12        | SAMN08724868  |
| KEN/Kilifi/WGS/1064_24/06/2012 | MH181893         | GA2      | 6-amplicon   | 1,151,112   | 400,912   | 14,572          | 4,631.14      | VIRALNGS  | 23.79     | 24/06/12        | SAMN08724869  |
| KEN/Kilifi/WGS/1066_28/06/2012 | MH181929         | ON1      | 14-amplicon  | 2,729,430   | 2,628,610 | 15,175          | 45,411.89     | VIRALNGS  | 18.55     | 28/06/12        | SAMN08724870  |
| KEN/Kilifi/WGS/1067_30/06/2012 | MH181894         | GA2      | 6-amplicon   | 1,691,236   | 114,412   | 14,698          | 1,384.07      | VIRALNGS  | 29.82     | 30/06/12        | SAMN08724871  |
| KEN/Kilifi/WGS/1068_10/07/2012 | MH181930         | ON1      | 14-amplicon  | 2,525,642   | 2,383,726 | 15,207          | 40,719.45     | VIRALNGS  | 20.98     | 10/07/12        | SAMN08724872  |
| KEN/Kilifi/WGS/1070_23/07/2012 | MH181931         | ON1      | 14-amplicon  | 2,159,538   | 1,535,640 | 15,049          | 26,480.83     | VIRALNGS  | 25.32     | 23/07/12        | SAMN08724873  |
| KEN/Kilifi/WGS/1071_14/08/2012 | MH181932         | ON1      | 14-amplicon  | 2,675,604   | 2,520,028 | 15,233          | 43,447.66     | SPADES    | 21.45     | 14/08/12        | SAMN08724874  |
| KEN/Kilifi/WGS/1075_27/10/2012 | MH181933         | ON1      | 14-amplicon  | 2,194,346   | 1,857,942 | 15,232          | 31,956.04     | SPADES    | 24.8      | 27/10/12        | SAMN08724875  |
| KEN/Kilifi/WGS/1076_30/10/2012 | MH181934         | ON1      | 14-amplicon  | 3,041,964   | 2,314,252 | 15,068          | 39,401.72     | VIRALNGS  | 23.24     | 30/10/12        | SAMN08724876  |
| KEN/Kilifi/WGS/1077_31/10/2012 | MH181935         | ON1      | 14-amplicon  | 2,438,426   | 2,175,418 | 15,232          | 37,609.41     | SPADES    | 22.49     | 31/10/12        | SAMN08724877  |
| KEN/Kilifi/WGS/1078_31/10/2012 | MH181936         | ON1      | 14-amplicon  | 2,476,744   | 2,311,046 | 15,230          | 39,698.20     | SPADES    | 21.93     | 31/10/12        | SAMN08724878  |
| KEN/Kilifi/WGS/1079_05/11/2012 | MH181937         | ON1      | 14-amplicon  | 2,114,774   | 1,819,602 | 15,232          | 31,236.65     | SPADES    | 22.13     | 05/11/12        | SAMN08724879  |
| KEN/Kilifi/WGS/1080_05/11/2012 | MH181938         | ON1      | 14-amplicon  | 1,786,686   | 1,465,770 | 15,074          | 25,257.87     | VIRALNGS  | 25.1      | 05/11/12        | SAMN08724880  |
| KEN/Kilifi/WGS/1081_07/11/2012 | MH181939         | ON1      | 14-amplicon  | 2,096,870   | 1,926,670 | 15,151          | 33,319.15     | VIRALNGS  | 21.73     | 07/11/12        | SAMN08724881  |
| KEN/Kilifi/WGS/1082_10/11/2012 | MH181940         | ON1      | 14-amplicon  | 1,699,646   | 1,240,272 | 15,214          | 21,458.29     | SPADES    | 24.24     | 10/11/12        | SAMN08724882  |
| KEN/Kilifi/WGS/1083_12/11/2012 | MH181941         | ON1      | 14-amplicon  | 2,060,860   | 1,899,520 | 15,222          | 32,687.98     | SPADES    | 19.74     | 12/11/12        | SAMN08724883  |
| KEN/Kilifi/WGS/1084_15/11/2012 | MH181942         | ON1      | 14-amplicon  | 1,632,392   | 380,376   | 14,959          | 6,498.76      | VIRALNGS  | 26.16     | 15/11/12        | SAMN08724884  |
| KEN/Kilifi/WGS/1086_15/11/2012 | MH181943         | ON1      | 14-amplicon  | 2,275,828   | 2,057,472 | 15,226          | 35,609.99     | SPADES    | 25.78     | 15/11/12        | SAMN08724885  |
| KEN/Kilifi/WGS/1087_17/11/2012 | MH181944         | ON1      | 14-amplicon  | 2,287,906   | 2,032,176 | 15,049          | 34,971.14     | VIRALNGS  | 21.43     | 17/11/12        | SAMN08724886  |
| KEN/Kilifi/WGS/1088_19/11/2012 | MH181945         | ON1      | 14-amplicon  | 2,701,940   | 2,645,394 | 15,171          | 45,076.37     | VIRALNGS  | 18.92     | 19/11/12        | SAMN08724887  |
| KEN/Kilifi/WGS/1089_19/11/2012 | MH181946         | ON1      | 14-amplicon  | 2,355,836   | 1,933,388 | 15,110          | 33,278.48     | VIRALNGS  | 23.96     | 19/11/12        | SAMN08724888  |
| KEN/Kilifi/WGS/1090_19/11/2012 | MH181947         | ON1      | 14-amplicon  | 2,286,976   | 2,185,794 | 15,171          | 37,746.72     | VIRALNGS  | 18.54     | 19/11/12        | SAMN08724889  |
| KEN/Kilifi/WGS/1091_22/11/2012 | MH181948         | ON1      | 14-amplicon  | 2,359,658   | 2,288,890 | 15,198          | 39,369.58     | VIRALNGS  | 16.91     | 22/11/12        | SAMN08724890  |
| KEN/Kilifi/WGS/1092_23/11/2012 | MH181949         | ON1      | 14-amplicon  | 2,060,978   | 1,566,076 | 15,025          | 26,801.24     | VIRALNGS  | 23.19     | 23/11/12        | SAMN08724891  |
| KEN/Kilifi/WGS/1093_23/11/2012 | MH181950         | ON1      | 14-amplicon  | 1,182,120   | 416,874   | 15,150          | 7,324.31      | SPADES    | 30.01     | 23/11/12        | SAMN08724892  |
| KEN/Kilifi/WGS/1094_23/11/2012 | MH181951         | ON1      | 14-amplicon  | 2,346,184   | 2,265,498 | 15,227          | 39,009.62     | SPADES    | 17.63     | 23/11/12        | SAMN08724893  |
| KEN/Kilifi/WGS/1095_24/11/2012 | MH181952         | ON1      | 14-amplicon  | 2,169,590   | 2,002,620 | 15,104          | 34,587.63     | VIRALNGS  | 24.14     | 24/11/12        | SAMN08724894  |
| KEN/Kilifi/WGS/1096_24/11/2012 | MH181953         | ON1      | 14-amplicon  | 2,697,992   | 2,627,426 | 15,183          | 45,492.81     | VIRALNGS  | 19.92     | 24/11/12        | SAMN08724895  |
| KEN/Kilifi/WGS/1097_24/11/2012 | MH181954         | ON1      | 14-amplicon  | 2,698,368   | 2,339,798 | 15,231          | 40,334.68     | SPADES    | 21.98     | 24/11/12        | SAMN08724896  |
| KEN/Kilifi/WGS/1098_25/11/2012 | MH181955         | ON1      | 14-amplicon  | 2,671,940   | 2,502,752 | 15,232          | 43,168.08     | SPADES    | 23.48     | 25/11/12        | SAMN08724897  |
| KEN/Kilifi/WGS/1099_25/11/2012 | MH181956         | ON1      | 14-amplicon  | 2,654,944   | 2,542,430 | 15,183          | 43,877.84     | VIRALNGS  | 20.64     | 25/11/12        | SAMN08724898  |
| KEN/Kilifi/WGS/1100_25/11/2012 | MH181957         | ON1      | 14-amplicon  | 2,232,292   | 2,011,214 | 15,033          | 34,492.22     | VIRALNGS  | 21.98     | 25/11/12        | SAMN08724899  |
| KEN/Kilifi/WGS/1101_25/11/2012 | MH181895         | GA2      | 6-amplicon   | 1,476,584   | 531,814   | 14,883          | 6,072.07      | VIRALNGS  | 24.75     | 25/11/12        | SAMN08724900  |
| KEN/Kilifi/WGS/1102_27/11/2012 | MH181958         | ON1      | 14-amplicon  | 3,137,122   | 3,001,672 | 15,185          | 51,523.50     | VIRALNGS  | 20.18     | 27/11/12        | SAMN08724901  |
| KEN/Kilifi/WGS/1103_27/11/2012 | MH181959         | ON1      | 14-amplicon  | 2,561,480   | 2,387,270 | 15,145          | 41,078.44     | VIRALNGS  | 20.05     | 27/11/12        | SAMN08724902  |
| KEN/Kilifi/WGS/1104_27/11/2012 | MH181960         | ON1      | 14-amplicon  | 2,367,006   | 2,217,710 | 15,139          | 38,181.27     | VIRALNGS  | 22.13     | 27/11/12        | SAMN08724903  |
| KEN/Kilifi/WGS/1105_28/11/2012 | MH181961         | ON1      | 14-amplicon  | 2,553,394   | 2,370,212 | 15,192          | 40,462.29     | SPADES    | 21.72     | 28/11/12        | SAMN08724904  |
| KEN/Kilifi/WGS/1106_28/11/2012 | MH181962         | ON1      | 14-amplicon  | 2,958,126   | 2,940,148 | 15,176          | 50,168.19     | VIRALNGS  | 18.98     | 28/11/12        | SAMN08724905  |
| KEN/Kilifi/WGS/1107_28/11/2012 | MH181963         | ON1      | 14-amplicon  | 2,781,054   | 1,786,998 | 15,030          | 31,236.67     | VIRALNGS  | 27.6      | 28/11/12        | SAMN08724906  |
| KEN/Kilifi/WGS/1108_28/11/2012 | MH181896         | GA2      | 6-amplicon   | 1,553,924   | 611,370   | 14,949          | 7,511.50      | VIRALNGS  | 25.74     | 28/11/12        | SAMN08724907  |
| KEN/Kilifi/WGS/1109_29/11/2012 | MH181964         | ON1      | 14-amplicon  | 3,244,876   | 3,065,026 | 15,232          | 52,644.38     | SPADES    | 27.01     | 29/11/12        | SAMN08724908  |
| KEN/Kilifi/WGS/1110_29/11/2012 | MH181965         | ON1      | 14-amplicon  | 2,          |           |                 |               |           |           |                 |               |

|                                |          |     |            |           |           |        |           |          |       |          |              |
|--------------------------------|----------|-----|------------|-----------|-----------|--------|-----------|----------|-------|----------|--------------|
| KEN/Kilifi/WGS/1160_31/05/2013 | MH181903 | GA2 | 6-amplicon | 1,349,884 | 520,174   | 14,764 | 6,539.51  | VIRALNGS | 22.57 | 31/05/13 | SAMN08724941 |
| KEN/Kilifi/WGS/1162_12/10/2013 | MH181991 | ON1 | 6-amplicon | 1,003,770 | 784,072   | 15,047 | 10,930.69 | VIRALNGS | 21.5  | 12/10/13 | SAMN08724942 |
| KEN/Kilifi/WGS/1163_15/10/2013 | MH181992 | ON1 | 6-amplicon | 1,071,636 | 612,044   | 15,053 | 8,500.36  | VIRALNGS | 22.21 | 15/10/13 | SAMN08724943 |
| KEN/Kilifi/WGS/1166_28/10/2013 | MH181993 | ON1 | 6-amplicon | 845,020   | 193,328   | 15,021 | 2,668.08  | VIRALNGS | 26.99 | 28/10/13 | SAMN08724944 |
| KEN/Kilifi/WGS/1167_04/11/2013 | MH181994 | ON1 | 6-amplicon | 1,165,720 | 474,594   | 15,023 | 6,649.96  | VIRALNGS | 25.14 | 04/11/13 | SAMN08724945 |
| KEN/Kilifi/WGS/1168_07/11/2013 | MH181995 | ON1 | 6-amplicon | 1,209,356 | 203,814   | 14,979 | 2,880.96  | VIRALNGS | 23.27 | 07/11/13 | SAMN08724946 |
| KEN/Kilifi/WGS/1169_07/11/2013 | MH181904 | GA2 | 6-amplicon | 1,606,550 | 1,029,916 | 15,011 | 10,948.78 | VIRALNGS | 19.27 | 07/11/13 | SAMN08724947 |
| KEN/Kilifi/WGS/1171_12/11/2013 | MH181996 | ON1 | 6-amplicon | 947,458   | 479,690   | 14,828 | 6,448.30  | VIRALNGS | 19.7  | 12/11/13 | SAMN08724948 |
| KEN/Kilifi/WGS/1173_19/11/2013 | MH181997 | ON1 | 6-amplicon | 1,058,828 | 662,216   | 15,052 | 9,348.85  | VIRALNGS | 30.66 | 19/11/13 | SAMN08724949 |
| KEN/Kilifi/WGS/1582_01/04/2014 | MH181998 | ON1 | 6-amplicon | 1,568,332 | 687,440   | 15,026 | 8,437.15  | VIRALNGS | 24.16 | 13/04/14 | SAMN08724950 |
| KEN/Kilifi/WGS/1583_13/04/2014 | MH181999 | ON1 | 6-amplicon | 302,368   | 39,148    | 14,734 | 510.27    | VIRALNGS | 26.44 | 15/04/14 | SAMN08724951 |
| KEN/Kilifi/WGS/1215_15/04/2014 | MH181905 | GA2 | 6-amplicon | 1,729,644 | 998,364   | 15,044 | 11,774.25 | VIRALNGS | 21.29 | 15/04/14 | SAMN08724952 |
| KEN/Kilifi/WGS/1584_23/04/2014 | MH182000 | ON1 | 6-amplicon | 1,842,612 | 244,414   | 14,868 | 2,917.30  | VIRALNGS | 26.07 | 26/11/14 | SAMN08724953 |
| KEN/Kilifi/WGS/1246_26/11/2014 | MH182001 | ON1 | 6-amplicon | 1,174,582 | 955,666   | 15,187 | 12,678.17 | VIRALNGS | 21.34 | 26/11/14 | SAMN08724954 |
| KEN/Kilifi/WGS/1247_04/12/2014 | MH182002 | ON1 | 6-amplicon | 706,526   | 491,376   | 15,055 | 6,409.80  | VIRALNGS | 24.28 | 04/12/14 | SAMN08724955 |
| KEN/Kilifi/WGS/1249_05/12/2014 | MH182003 | ON1 | 6-amplicon | 2,218,820 | 1,646,984 | 15,057 | 19,674.11 | VIRALNGS | 24.08 | 05/12/14 | SAMN08724956 |
| KEN/Kilifi/WGS/1250_06/12/2014 | MH182004 | ON1 | 6-amplicon | 218,950   | 110,400   | 14,825 | 1,493.04  | VIRALNGS | 24.93 | 06/12/14 | SAMN08724957 |
| KEN/Kilifi/WGS/1251_06/12/2014 | MH182005 | ON1 | 6-amplicon | 1,174,208 | 89,898    | 14,802 | 1,320.67  | VIRALNGS | 26.32 | 06/12/14 | SAMN08724958 |
| KEN/Kilifi/WGS/1252_07/12/2014 | MH182006 | ON1 | 6-amplicon | 1,114,664 | 424,006   | 15,043 | 5,840.78  | VIRALNGS | 24.72 | 07/12/14 | SAMN08724959 |
| KEN/Kilifi/WGS/1253_08/12/2014 | MH182007 | ON1 | 6-amplicon | 1,657,878 | 791,536   | 15,047 | 10,202.00 | VIRALNGS | 27.31 | 08/12/14 | SAMN08724960 |
| KEN/Kilifi/WGS/1254_08/12/2014 | MH182008 | ON1 | 6-amplicon | 2,111,452 | 1,448,258 | 15,052 | 19,567.76 | VIRALNGS | 24.71 | 08/12/14 | SAMN08724961 |
| KEN/Kilifi/WGS/1256_09/12/2014 | MH182009 | ON1 | 6-amplicon | 929,072   | 446,432   | 15,167 | 5,904.01  | VIRALNGS | 27.5  | 09/12/14 | SAMN08724962 |
| KEN/Kilifi/WGS/1257_10/12/2014 | MH182010 | ON1 | 6-amplicon | 905,314   | 679,084   | 15,023 | 9,435.24  | VIRALNGS | 24.48 | 10/12/14 | SAMN08724963 |
| KEN/Kilifi/WGS/1258_11/12/2014 | MH182011 | ON1 | 6-amplicon | 1,549,978 | 1,255,922 | 15,058 | 16,074.53 | VIRALNGS | 21.74 | 11/12/14 | SAMN08724964 |
| KEN/Kilifi/WGS/1260_14/12/2014 | MH182012 | ON1 | 6-amplicon | 1,050,160 | 881,444   | 15,060 | 11,114.68 | VIRALNGS | 23.38 | 14/12/14 | SAMN08724965 |
| KEN/Kilifi/WGS/1261_14/12/2014 | MH182013 | ON1 | 6-amplicon | 1,109,236 | 931,816   | 15,047 | 12,570.43 | VIRALNGS | 25.45 | 14/12/14 | SAMN08724966 |
| KEN/Kilifi/WGS/1263_15/12/2014 | MH182014 | ON1 | 6-amplicon | 1,227,836 | 608,602   | 15,180 | 8,407.71  | VIRALNGS | 26.53 | 15/12/14 | SAMN08724967 |
| KEN/Kilifi/WGS/1264_15/12/2014 | MH182015 | ON1 | 6-amplicon | 713,002   | 11,594    | 14,172 | 179.84    | VIRALNGS | 32.25 | 15/12/14 | SAMN08724968 |
| KEN/Kilifi/WGS/1266_17/12/2014 | MH182016 | ON1 | 6-amplicon | 1,620,164 | 1,332,364 | 15,059 | 16,697.38 | VIRALNGS | 23.34 | 17/12/14 | SAMN08724969 |
| KEN/Kilifi/WGS/1268_17/12/2014 | MH182017 | ON1 | 6-amplicon | 2,064,268 | 1,740,450 | 15,148 | 21,533.23 | VIRALNGS | 22.85 | 17/12/14 | SAMN08724970 |
| KEN/Kilifi/WGS/1269_17/12/2014 | MH182018 | ON1 | 6-amplicon | 1,193,216 | 830,040   | 15,187 | 11,270.51 | VIRALNGS | 25.02 | 17/12/14 | SAMN08724971 |
| KEN/Kilifi/WGS/1271_18/12/2014 | MH182019 | ON1 | 6-amplicon | 966,686   | 822,958   | 15,098 | 11,699.58 | VIRALNGS | 22.74 | 18/12/14 | SAMN08724972 |
| KEN/Kilifi/WGS/1273_19/12/2014 | MH182020 | ON1 | 6-amplicon | 1,279,716 | 942,368   | 15,053 | 12,026.06 | VIRALNGS | 24.03 | 19/12/14 | SAMN08724973 |
| KEN/Kilifi/WGS/1274_21/12/2014 | MH182021 | ON1 | 6-amplicon | 1,097,012 | 811,778   | 15,184 | 10,575.22 | VIRALNGS | 26.9  | 21/12/14 | SAMN08724974 |
| KEN/Kilifi/WGS/1275_22/12/2014 | MH182022 | ON1 | 6-amplicon | 1,650,292 | 1,292,028 | 15,047 | 17,744.98 | VIRALNGS | 25.17 | 22/12/14 | SAMN08724975 |
| KEN/Kilifi/WGS/1278_25/12/2014 | MH182023 | ON1 | 6-amplicon | 1,064,228 | 735,742   | 15,155 | 9,942.56  | VIRALNGS | 28.76 | 25/12/14 | SAMN08724976 |
| KEN/Kilifi/WGS/1279_27/12/2014 | MH182024 | ON1 | 6-amplicon | 757,922   | 130,334   | 14,824 | 1,797.32  | VIRALNGS | 27.91 | 27/12/14 | SAMN08724977 |
| KEN/Kilifi/WGS/1281_30/12/2014 | MH182025 | ON1 | 6-amplicon | 921,080   | 610,496   | 15,164 | 8,271.09  | VIRALNGS | 22.41 | 30/12/14 | SAMN08724978 |
| KEN/Kilifi/WGS/1282_31/12/2014 | MH182026 | ON1 | 6-amplicon | 1,648,622 | 676,458   | 15,020 | 8,667.22  | VIRALNGS | 29.32 | 31/12/14 | SAMN08724979 |
| KEN/Kilifi/WGS/1283_31/12/2014 | MH182027 | ON1 | 6-amplicon | 1,315,628 | 694,854   | 15,031 | 9,598.81  | VIRALNGS | 24.97 | 31/12/14 | SAMN08724980 |
| KEN/Kilifi/WGS/1284_02/01/2015 | MH182028 | ON1 | 6-amplicon | 1,059,850 | 813,254   | 15,184 | 10,727.02 | VIRALNGS | 24.28 | 02/01/15 | SAMN08724981 |
| KEN/Kilifi/WGS/1286_04/01/2015 | MH182029 | ON1 | 6-amplicon | 2,048,806 | 1,502,422 | 15,056 | 18,679.43 | VIRALNGS | 25.14 | 04/01/15 | SAMN08724982 |
| KEN/Kilifi/WGS/1287_06/01/2015 | MH182030 | ON1 | 6-amplicon | 1,320,088 | 1,006,680 | 15,204 | 13,479.43 | VIRALNGS | 22.91 | 06/01/15 | SAMN08724983 |
| KEN/Kilifi/WGS/1288_07/01/2015 | MH182031 | ON1 | 6-amplicon | 537,376   | 426,692   | 15,059 | 5,429.30  | VIRALNGS | 23.91 | 07/01/15 | SAMN08724984 |
| KEN/Kilifi/WGS/1289_08/01/2015 | MH182032 | ON1 | 6-amplicon | 1,099,200 | 783,598   | 15,044 | 11,047.58 | VIRALNGS | 23.81 | 08/01/15 | SAMN08724985 |
| KEN/Kilifi/WGS/1290_08/01/2015 | MH182033 | ON1 | 6-amplicon | 930,504   | 107,914   | 14,796 | 1,529.49  | VIRALNGS | 34.87 | 08/01/15 | SAMN08724986 |
| KEN/Kilifi/WGS/1292_09/01/2015 | MH182034 | ON1 | 6-amplicon | 770,526   | 7,412     | 14,216 | 111.73    | VIRALNGS | 28.13 | 09/01/15 | SAMN08724987 |
| KEN/Kilifi/WGS/1293_24/01/2015 | MH182035 | ON1 | 6-amplicon | 1,040,044 | 848,258   | 15,056 | 10,945.92 | VIRALNGS | 24.24 | 24/01/15 | SAMN08724988 |
| KEN/Kilifi/WGS/1295_27/01/2015 | MH182036 | ON1 | 6-amplicon | 959,732   | 725,710   | 15,206 | 9,327.55  | VIRALNGS | 23.86 | 27/01/15 | SAMN08724989 |
| KEN/Kilifi/WGS/1296_29/01/2015 | MH182037 | ON1 | 6-amplicon | 1,024,190 | 681,324   | 15,052 | 9,406.83  | VIRALNGS | 25.01 | 29/01/15 | SAMN08724990 |
| KEN/Kilifi/WGS/1298_31/01/2015 | MH182038 | ON1 | 6-amplicon | 765,634   | 523,320   | 15,047 | 7,236.79  | VIRALNGS | 24.66 | 31/01/15 | SAMN08724991 |
| KEN/Kilifi/WGS/1299_04/02/2015 | MH182039 | ON1 | 6-amplicon | 1,390,092 | 34,784    | 14,741 | 497.77    | VIRALNGS | 31.57 | 04/02/15 | SAMN08724992 |
| KEN/Kilifi/WGS/1301_08/02/2015 | MH182040 | ON1 | 6-amplicon | 1,184,664 | 633,118   | 15,117 | 8,281.10  | VIRALNGS | 25.06 | 08/02/15 | SAMN08724993 |
| KEN/Kilifi/WGS/1302_13/02/2015 | MH182041 | ON1 | 6-amplicon | 1,134,242 | 469,232   | 14,848 | 8,627.43  | VIRALNGS | 25.69 | 13/02/15 | SAMN08724994 |
| KEN/Kilifi/WGS/1305_21/02/2015 | MH182042 | ON1 | 6-amplicon | 912,242   | 614,448   | 15,102 | 8,643.56  | VIRALNGS | 28.16 | 21/02/15 | SAMN08724995 |
| KEN/Kilifi/WGS/1307_26/02/2015 | MH182043 | ON1 | 6-amplicon | 1,032,236 | 867,040   | 15,033 | 11,866.93 | VIRALNGS | 24.37 | 26/02/15 | SAMN08724996 |
| KEN/Kilifi/WGS/1308_05/03/2015 | MH182044 | ON1 | 6-amplicon | 1,204,456 | 1,053,810 | 15,201 | 13,377.58 | VIRALNGS | 24.26 | 05/03/15 | SAMN08724997 |
| KEN/Kilifi/WGS/1309_08/03/2015 | MH182045 | ON1 | 6-amplicon | 1,110,724 | 915,046   | 15,053 | 12,126.92 | VIRALNGS | 24.14 | 08/03/15 | SAMN08724998 |
| KEN/Kilifi/WGS/1311_21/03/2015 | MH182046 | ON1 | 6-amplicon | 307,420   | 193,146   | 14,740 | 2,480.30  | VIRALNGS | 27.9  | 21/03/15 | SAMN08724999 |
| KEN/Kilifi/WGS/1312_22/03/2015 | MH182047 | ON1 | 6-amplicon | 1,722,762 | 1,296,644 | 15,050 | 15,953.55 | VIRALNGS | 24.91 | 22/03/15 | SAMN08725000 |
| KEN/Kilifi/WGS/1313_27/03/2015 | MH182048 | ON1 | 6-amplicon | 1,143,280 | 429,554   | 14,827 | 5,977.84  | VIRALNGS | 27.51 | 27/03/15 | SAMN08725001 |
| KEN/Kilifi/WGS/1314_31/03/2015 | MH181906 | GA2 | 6-amplicon | 1,625,342 | 1,010,186 | 15,022 | 11,311.20 | VIRALNGS | 20.75 | 31/03/15 | SAMN08725002 |
| KEN/Kilifi/WGS/1315_01/04/2015 | MH182049 | ON1 | 6-amplicon | 1,107,120 | 740,496   | 15,066 | 9,340.28  | VIRALNGS | 23.95 | 01/04/15 | SAMN08725003 |
| KEN/Kilifi/WGS/1318_08/04/2015 | MH182050 | ON1 | 6-amplicon | 900,852   | 759,034   | 15,202 | 9,913.31  | VIRALNGS | 23.52 | 08/04/15 | SAMN08725004 |
| KEN/Kilifi/WGS/1320_12/04/2015 | MH182051 | ON1 | 6-amplicon | 1,698,698 | 1,185,294 | 15,048 | 14,503.36 | VIRALNGS | 24.15 | 12/04/15 | SAMN08725005 |
| KEN/Kilifi/WGS/1321_17/04/2015 | MH182052 | ON1 | 6-amplicon | 1,074,506 | 944,630   | 15,019 | 12,360.20 | VIRALNGS | 25.73 | 17/04/15 | SAMN08725006 |
| KEN/Kilifi/WGS/1322_17/04/2014 | MH181907 | GA2 | 6-amplicon | 1,398,136 | 367,740   | 14,757 | 4,605.53  | VIRALNGS | 23.73 | 17/04/14 | SAMN08725007 |
| KEN/Kilifi/WGS/1297_29/01/2015 | MH182053 | ON1 | 6-amplicon | 1,598,292 | 1,046     | 13,966 | 39.95     | VIRALNGS | NA    | 29/01/15 | SAMN08725008 |
| KEN/Kilifi/WGS/1585_17/02/2016 | MH182054 | ON1 | 6-amplicon | 1,149,120 | 700,486   | 15,082 | 8,828.96  | VIRALNGS | 22.09 | 17/02/16 | SAMN08725009 |
| KEN/Kilifi/WGS/1586_28/01/2016 | MH182055 | ON1 | 6-amplicon | 1,156,030 | 266,436   | 14,704 | 3,938.20  | VIRALNGS | 22.58 | 28/01/16 | SAMN08725010 |
| KEN/Kilifi/WGS/1587_08/02/2016 | MH182056 | ON1 | 6-amplicon | 939,876   | 48,486    | 14,882 | 712.62    | VIRALNGS | 25.82 | 08/02/16 | SAMN08725011 |
| KEN/Kilifi/WGS/1588_29/03/2016 | MH182057 | ON1 | 6-amplicon | 1,021,102 | 391,966   | 14,993 | 4,937.68  | VIRALNGS | 25.32 | 29/03/16 | SAMN08725012 |
| KEN/Kilifi/WGS/1589_26/01/2016 | MH182058 | ON1 | 6-amplicon | 1,281,062 | 99,496    | 14,660 | 1,353.70  | VIRALNGS | 25.92 | 26/01/16 | SAMN08725013 |
| KEN/Kilifi/WGS/1590_01/02/2016 | MH182059 | ON1 | 6-amplicon | 1,153,340 | 441,172   | 15,035 | 5,304.08  | VIRALNGS | 22.02 | 01/02/16 | SAMN08725014 |
| KEN/Kilifi/WGS/1591_18/01/2016 | MH182060 | ON1 | 6-amplicon | 1,124,140 | 191,242   | 15,026 | 2,565.53  | VIRALNGS | 22.5  | 18/01/16 | SAMN08725015 |
| KEN/Kilifi/WGS/1592_07/04/2016 | MH182061 | ON1 | 6-amplicon | 1,089,038 | 647,740   | 15,078 | 8,421.34  | VIRALNGS | 27.7  | 07/04/16 | SAMN08725016 |
