# Supplementary material for: Whole genome analysis of local Kenyan and global sequences unravels the epidemiological and molecular evolutionary dynamics of RSV genotype ON1 strains
Source: PubMed Central journal article supplement (PMC6153471; doi:10.1093/ve/vey027), 2018-09-24

**S1 Fig:** Sampling locations of the global ON1 G-gene dataset with circles representative of relative proportion of contributing sequences by country

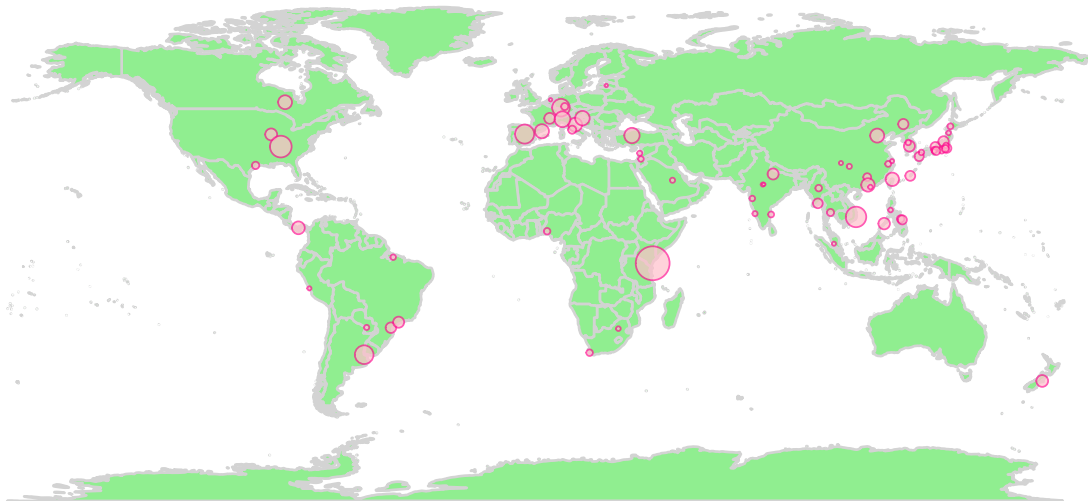

**S2 Fig:** Histograms showing distribution of Ct values for samples from the (A) KHDSS and (B) KCH

**A.**

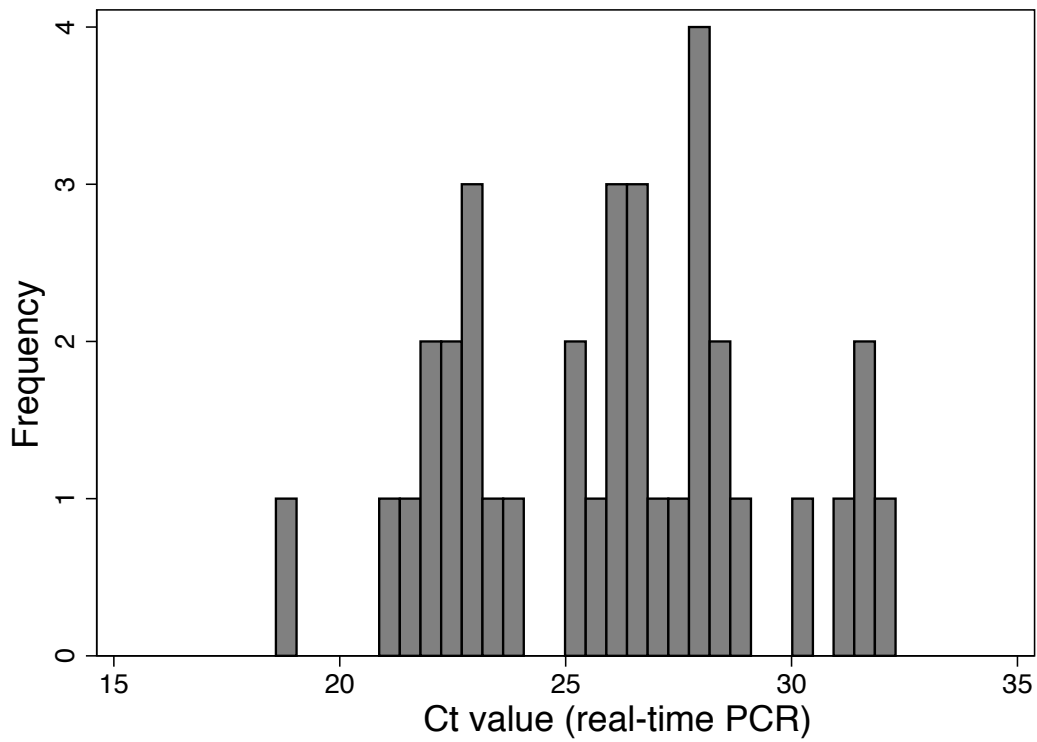

**B.**

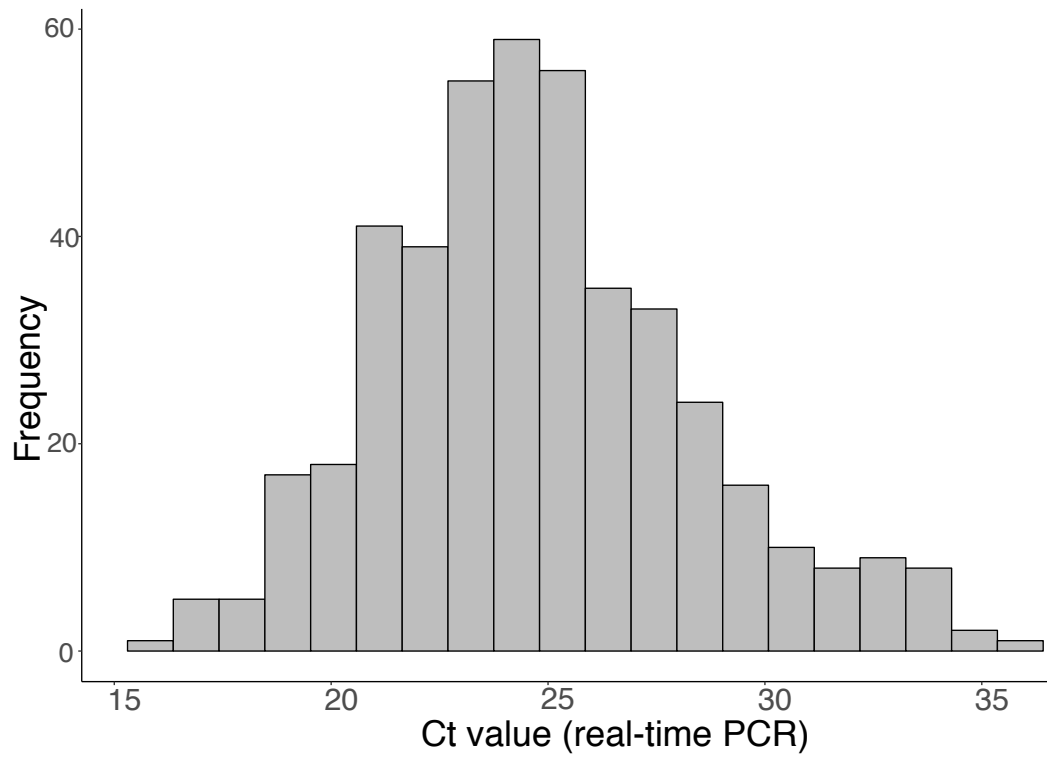

**S3 Fig: Root-to-tip regression analysis of Kilifi RSV-A ORFs**

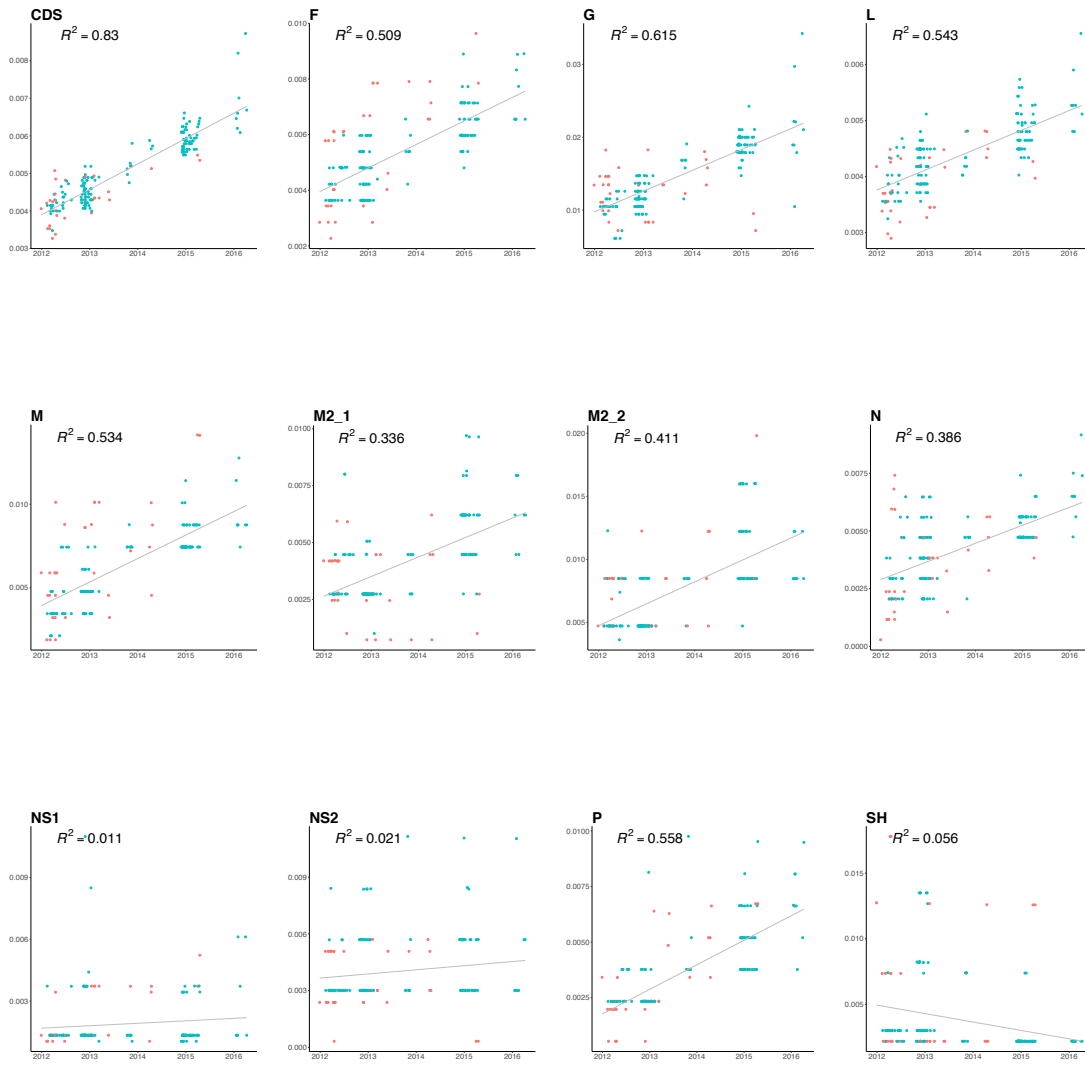

**S4 Fig:** BEAST MCC trees showing divergence between ON1(cyan) and GA2 (red) ORFs

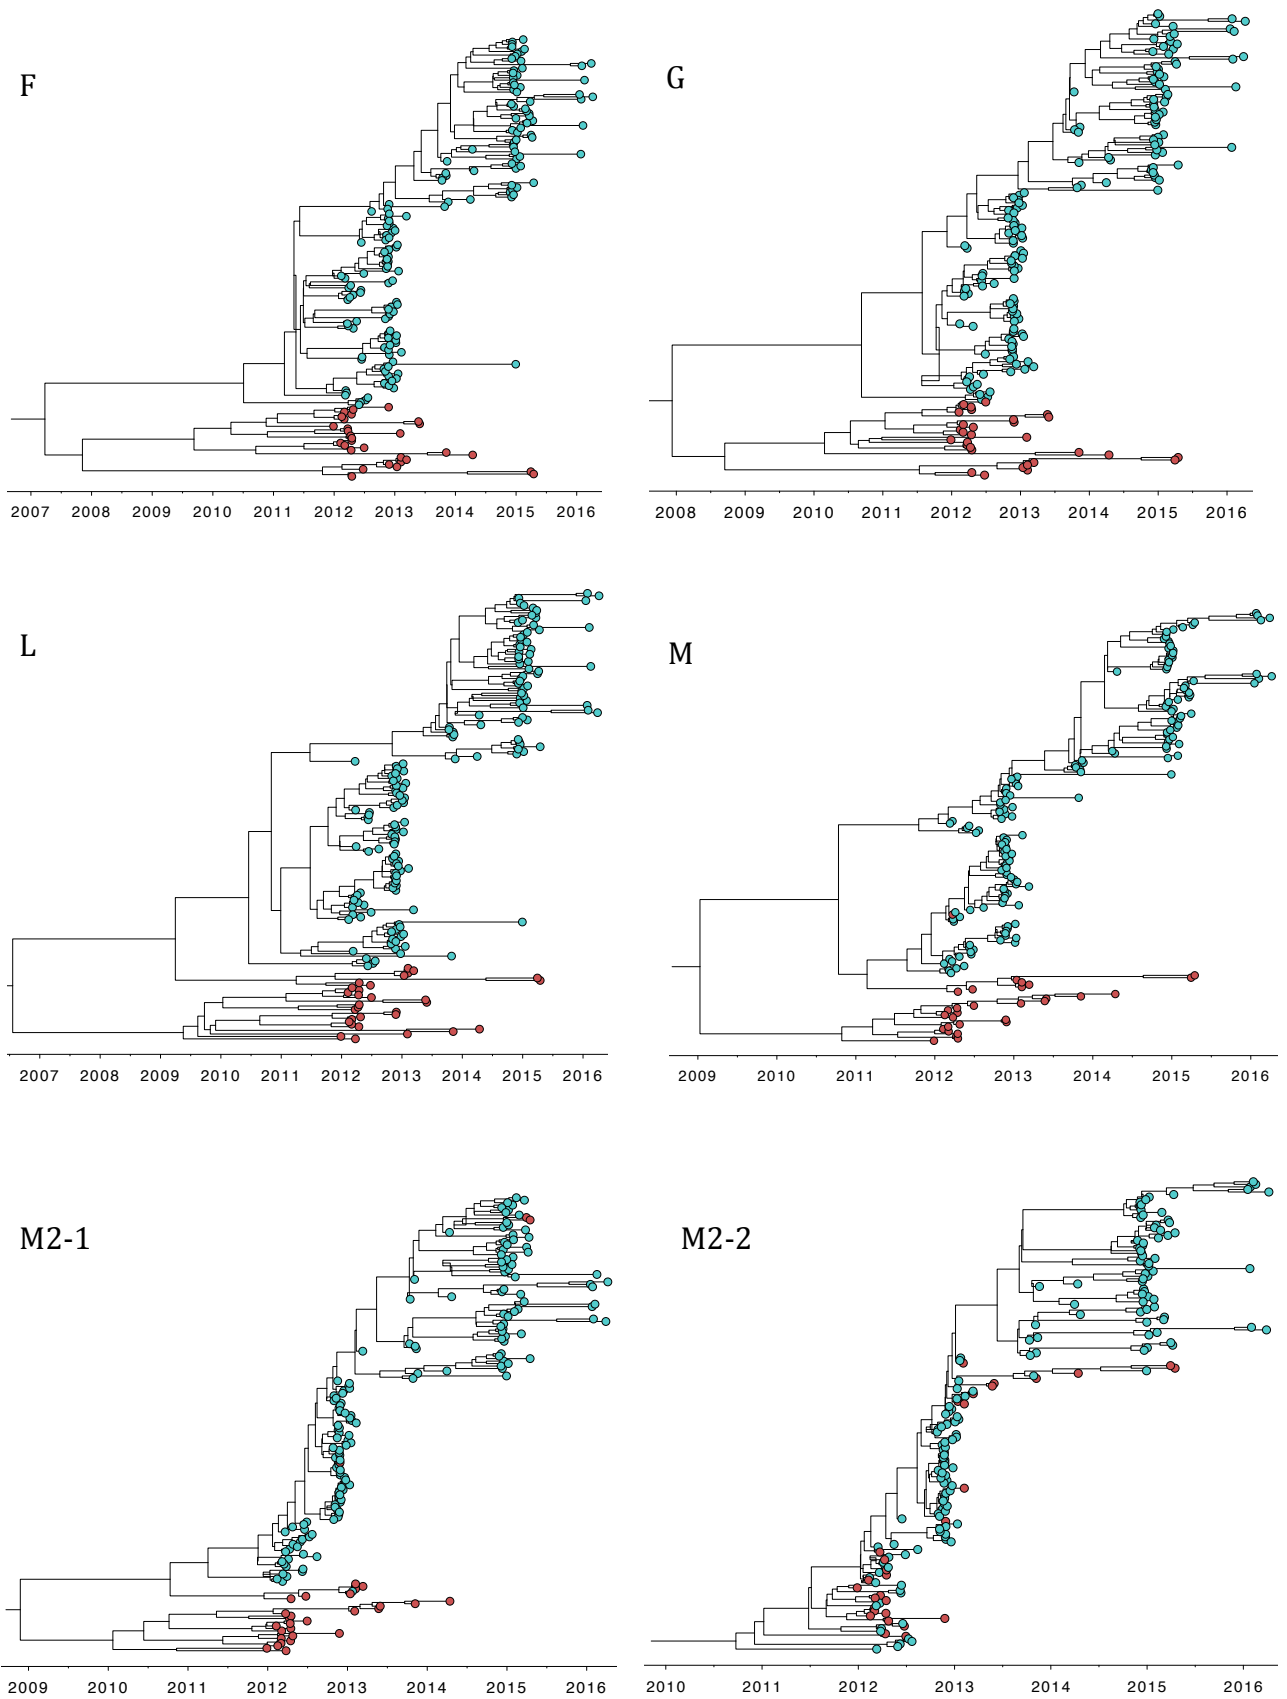

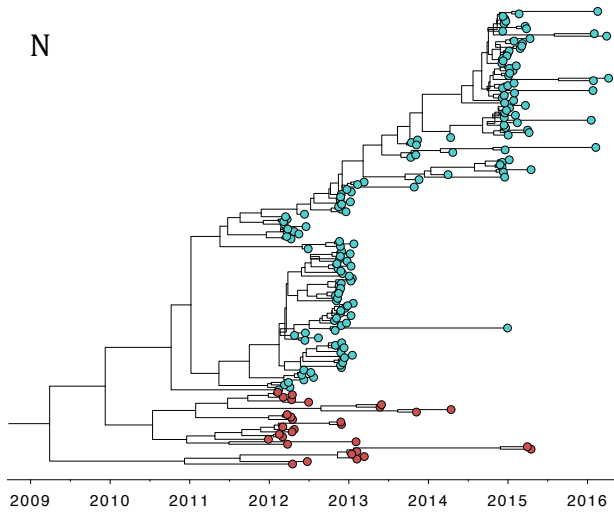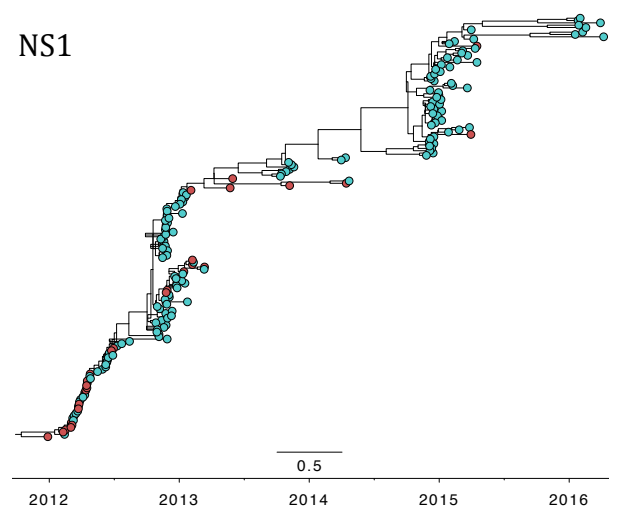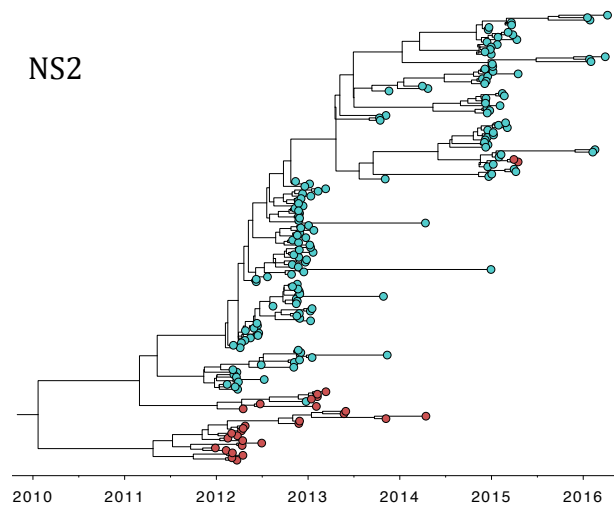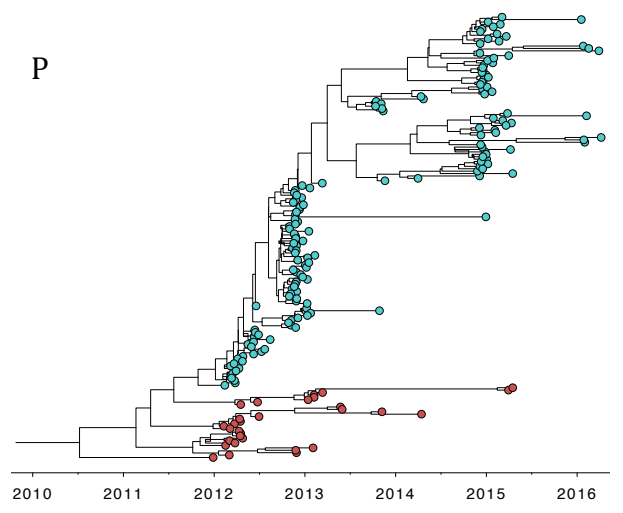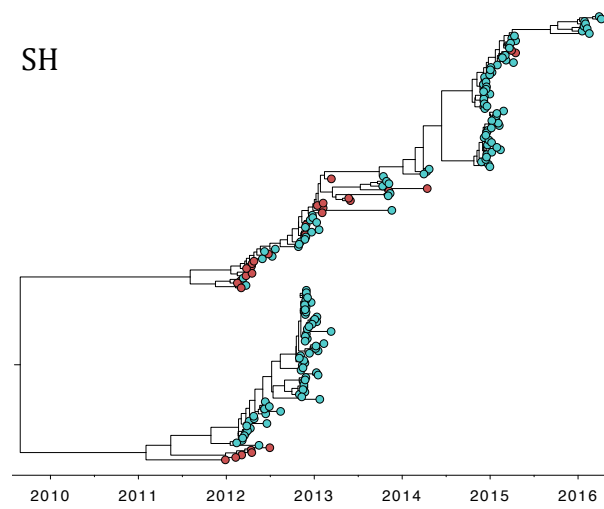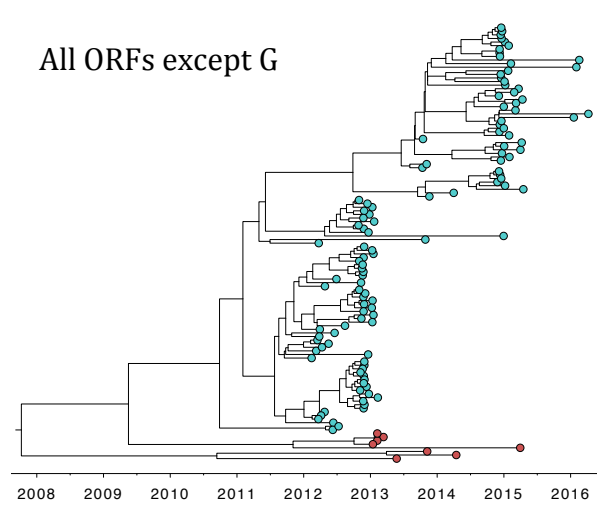

Supplement: vey027_supplementary_figures.pdf [file vey027_supplementary_figures.pdf]
