# Supplementary material for: Whole genome analysis of local Kenyan and global sequences unravels the epidemiological and molecular evolutionary dynamics of RSV genotype ON1 strains
Source: PubMed Central journal article supplement (PMC6153471; doi:10.1093/ve/vey027), 2018-09-24
Supplement: vey027_supplementary_s1_table.pdf [file vey027_supplementary_s1_table.pdf]

| <b>Clock + Population model</b> | <b>PS</b>        | <b>SS</b>        |
|---------------------------------|------------------|------------------|
| Strict + Skyline                | -40221.86        | -40237.00        |
| Relaxed + Skyline               | <u>-40203.78</u> | <u>-40212.06</u> |
| Strict + Exponential            | -40285.47        | -40293.39        |
| Strict + Constant               | -40284.81        | -40293.96        |
| Relaxed + Constant              | -40263.39        | -40275.27        |
| Relaxed + Exponential           | -40272.20        | -40283.01        |
