# Supplementary material for: Whole genome analysis of local Kenyan and global sequences unravels the epidemiological and molecular evolutionary dynamics of RSV genotype ON1 strains
Source: PubMed Central journal article supplement (PMC6153471; doi:10.1093/ve/vey027), 2018-09-24
Supplement: vey027_supplementary_s5_table.pdf [file vey027_supplementary_s5_table.pdf]

| CDS  | CDS Nt Pos. | SNP Codon Pos. | CDS AA Pos. | Change | AA Change | SNP Type     |
|------|-------------|----------------|-------------|--------|-----------|--------------|
| N    | 151         | 1              | 51          | T -> C |           | Transition   |
| N    | 558         | 3              | 186         | T -> C |           | Transition   |
| N    | 561         | 3              | 187         | T -> C |           | Transition   |
| N    | 717         | 3              | 239         | T -> C |           | Transition   |
| P    | 567         | 3              | 189         | T -> C |           | Transition   |
| M    | 111         | 3              | 37          | C -> T |           | Transition   |
| M    | 123         | 3              | 41          | A -> G |           | Transition   |
| G    | 69          | 3              | 23          | G -> A |           | Transition   |
| G    | 383         | 2              | 128         | C -> T | S -> F    | Transition   |
| G    | 821         | 2              | 274         | C -> T | P -> L    | Transition   |
| G    | 840         | 3              | 280         | C -> T |           | Transition   |
| G    | 893         | 2              | 298         | C -> T | P -> L    | Transition   |
| G    | 910         | 1              | 304         | C -> T | H -> Y    | Transition   |
| G    | 929         | 2              | 310         | C -> T | P -> L    | Transition   |
| F    | 309         | 3              | 103         | C -> T |           | Transition   |
| F    | 364         | 1              | 122         | G -> A | A -> T    | Transition   |
| F    | 516         | 3              | 172         | A -> G |           | Transition   |
| F    | 1507        | 1              | 503         | C -> A | L -> I    | Transversion |
| M2-1 | 549         | 3              | 183         | T -> C |           | Transition   |
| M2-2 | 131         | 2              | 44          | A -> G | N -> S    | Transition   |
| L    | 219         | 3              | 73          | G -> A |           | Transition   |
| L    | 297         | 3              | 99          | G -> T |           | Transversion |
| L    | 528         | 3              | 176         | T -> C |           | Transition   |
| L    | 540         | 3              | 180         | A -> C | K -> N    | Transversion |
| L    | 774         | 3              | 258         | C -> T |           | Transition   |
| L    | 1002        | 3              | 334         | G -> A |           | Transition   |
| L    | 1101        | 3              | 367         | C -> T |           | Transition   |
| L    | 1599        | 3              | 533         | T -> C |           | Transition   |
| L    | 1782        | 3              | 594         | A -> G |           | Transition   |
| L    | 4122        | 3              | 1374        | G -> A |           | Transition   |
| L    | 4437        | 3              | 1479        | G -> A |           | Transition   |
| L    | 5457        | 3              | 1819        | T -> C |           | Transition   |
| L    | 5991        | 3              | 1997        | C -> T |           | Transition   |
